# Supplementary material for: A System-Level Investigation into the Mechanisms of Chinese Traditional Medicine: Compound Danshen Formula for Cardiovascular Disease Treatment
Source: PLoS One. 2012 Sep 4;7(9):e43918. doi: 10.1371/journal.pone.0043918 (PMC3433480; doi:10.1371/journal.pone.0043918)
Supplement: Table S1 — The oral bioavailability of all compounds. (XLS) [file pone.0043918.s001.xls]

## Sheet: Sheet1
Compound Index	Compound Name	Oral Bioavailability
Molecule0	(25R)-5α-spirostan-3β-ol	15.4255
Molecule1	1,2,5,6-tetrahydrotanshinone	45.6799
Molecule10	2α,3α,19-trihydroxy urs-12-en-28-oicacid	16.5909
Molecule100	ethyl lithospermate	26.3682
Molecule101	ferruginol	15.3607
Molecule102	germacreneB	16.2663
Molecule104	heptacosane	8.18071
Molecule105	hexadecane	8.70428
Molecule106	isocryptotanshi-none	60.0795
Molecule107	isoferulicacid	67.6917
Molecule108	isosalvianolic acid C	2.48393
Molecule109	isotanshinoneIIB	61.6422
Molecule11	2α,3α-dihydroxy urs-12-en-28-oicacid	15.6686
Molecule110	isotanshinoneⅡA	55.0864
Molecule111	isotanshinoneⅠ	29.7639
Molecule113	linoleic acid	46.9044
Molecule114	lithospermic acid monomethyl ester	2.66521
Molecule115	lithospermic acid	2.67408
Molecule116	luteolin	11.7679
Molecule117	manool	54.9471
Molecule118	methylrosmarinate	1.3747
Molecule119	methyltanshinonate	19.5065
Molecule12	3,4-dihydroxyphenyl ethanol ketone	27.5264
Molecule120	microstegiol	30.9414
Molecule121	miltiodiol	38.8423
Molecule122	miltiononeI	54.7485
Molecule123	miltiononeII	70.1698
Molecule124	miltipolone	27.259
Molecule125	miltironeI	38.9233
Molecule126	miltironeII	49.9511
Molecule127	neocryptotanshinoneII	44.513
Molecule128	neocryptotanshinone	62.8482
Molecule13	3,7-dimethylocta-2,6-dien-1-yl formate	60.3707
Molecule130	norsalvioxide	23.9398
Molecule131	nortanshinone	40.0034
Molecule133	octadecanol	12.6573
Molecule134	oleanolic acid	17.4614
Molecule136	paramiltioic acid	23.2949
Molecule137	pentacosane	8.24936
Molecule139	prolithospermic acid	72.3486
Molecule14	3-O-acetyloleanolic acid	16.5033
Molecule140	protocatechuic acid	26.2906
Molecule141	protocaterchualdehyde	58.4054
Molecule142	przewalskin	34.621
Molecule143	przewalskinic acidA	2.62233
Molecule144	przewalskinoneB	22.9509
Molecule145	rosmarinicacid	1.3801
Molecule146	saloilenone	8.22871
Molecule147	salviacoccin	14.5797
Molecule148	salvianic acid A	78.2186
Molecule149	salvianic acid C	1.45029
Molecule15	3α-hydroxytanshinoneⅡA	50.1014
Molecule150	salvianolic acid A	2.95673
Molecule151	salvianolic acid B	3.01368
Molecule152	salvianolic acid C	2.50066
Molecule153	salvianolic acid D	1.57395
Molecule154	salvianolic acid E	3.01372
Molecule155	salvianolic acid F	1.38511
Molecule156	salvianolic acid G	51.9019
Molecule157	salvianolic acid J	57.1843
Molecule158	salvianolic acid N	1.45623
Molecule159	salvilenoneⅠ	38.7396
Molecule16	3β-hydroxytanshinoneⅡA	47.1745
Molecule160	salviol	13.1592
Molecule161	salviolone	32.508
Molecule162	salvipisone	13.1856
Molecule163	saprorthoquinone	18.3303
Molecule164	sclareol	49.9728
Molecule165	serine	105.332
Molecule166	shanzhiside methyl ester	8.85099
Molecule167	spathulenol	82.7904
Molecule17	4-Thujanolsabinenehydrate()2.mol2	94.9183
Molecule170	succinic acid	21.8333
Molecule171	sugiol	34.4945
Molecule172	tanshindiol A	74.5401
Molecule173	tanshindiol B	47.5794
Molecule174	tanshindiol C	47.8716
Molecule175	tanshinlactone	29.13
Molecule176	tanshinoneIIA	20.3175
Molecule177	tanshinoneIIB	70.1869
Molecule178	tanshinoneVI	49.5933
Molecule179	tanshinoneV	6.49604
Molecule18	4-hydroxy-1-vinyl carboxy-7-(3，4-dihydroxypheny1)benzo[b]furan	77.7499
Molecule180	tanshinone I	29.3231
Molecule181	terpinene-4-ol	37.6957
Molecule182	threonine	70.9937
Molecule183	tigo-genin	17.1301
Molecule184	tyrosine	70.5245
Molecule185	uvaol	42.4895
Molecule186	vitamin E	14.2646
Molecule187	Δ1-dehydrotanshinoneⅡA	48.6717
Molecule188	Δ1-dehydromiltirone	41.1327
Molecule189	α-Pinene	51.1998
Molecule19	4-methylenemiltirone	34.4747
Molecule190	α-amyrin	29.0048
Molecule191	α-cadinol	35.8894
Molecule193	α-thujene	52.1292
Molecule194	β-Cadinol	37.7633
Molecule195	β-Chamigrene	38.0233
Molecule196	β-Phellandrene	45.4734
Molecule199	α-elemene	27.0776
Molecule2	1,2-cis-2-(3，4-dimethoxy-hydroxypheny1)-acrylicacid	68.6561
Molecule20	5-(3-hydroxypropyl)-7-methoxy-2-(3-methoxy-4-hydroxyphenyl)-3-benzo[b]furancarbaldehyde	15.3494
Molecule200	γ-terpinene	33.0164
Molecule201	δ-cadinene	17.3089
Molecule202	(2E,6E)-3,7,11-trimethyl-2,6,10-dodecanetrieneol	37.7242
Molecule203	(R)-(1-methoxyethyl)benzene	47.2202
Molecule204	1,3-cyclooctadiene1	47.8223
Molecule205	1,4,5-trimethyl-5,6-dialin	52.6881
Molecule206	1,4,6-trimethyl-1,2,3,4-tetralin	50.1294
Molecule207	1,6-dimethyl-4-isopropylnaphthalene	13.0167
Molecule208	1-ethyl-2-methyl cyclopropane	44.6716
Molecule209	1-methyl-5-isopropenyl cyclohexene	53.1959
Molecule21	6-O-syringyl-8-O-acetyl shanzhiside methyl ester	51.6907
Molecule210	10-methyl nonadecane	10.2847
Molecule211	14-methyl pentadecanoate	9.96167
Molecule212	2,3-dichloroaniline	49.5133
Molecule213	2,4-heptadiene aldehyde	26.2912
Molecule214	2,6-dimethyl-cyclohexanol	76.2834
Molecule215	2,6-ditertbutyl paracresol	45.0802
Molecule216	2-ethanoyl-1H-pyrrole	63.9169
Molecule217	2-hydroxycinnamic acid	66.0014
Molecule218	2-octanone	19.2681
Molecule219	3',5'-dimethoxy acetophenone	28.2143
Molecule22	7-carbonyl-12-hydroxy-dehydroabietane	36.9939
Molecule220	3,4-dichloroaniline	9.91916
Molecule221	3-ethyl-2,4-pentylene alcohol	51.9753
Molecule222	4-Methoxyphenol	48.9815
Molecule223	5-methyl furfural	49.4898
Molecule224	5-octadecyne	15.9034
Molecule225	6-hydrogenation-(5E,9E)-6,10,14-Trimethylpentadeca-5,9,13-trien-2-one	23.3024
Molecule226	9,12-octadecadienoic acid methyl ester	46.9344
Molecule227	Alloaromadedrene	60.0719
Molecule228	Benzenemethanol,a,a-dimethyl-	65.8163
Molecule23	7-oxoroyleanone2.mol2	15.0654
Molecule230	Dencichine	71.6985
Molecule231	Di(2-ethylhexyl)phthalate	48.5933
Molecule232	Ethyl linoleate	46.9962
Molecule233	Ginsenoside F1	4.05373
Molecule234	Ginsenoside F2	36.4317
Molecule235	Ginsenoside Rb1	6.24071
Molecule236	Ginsenoside Rb2	5.98523
Molecule237	Ginsenoside Rb3	5.97956
Molecule238	Ginsenoside Rc	8.1593
Molecule239	Ginsenoside Rd	5.68945
Molecule24	7β-hydroxy-8-13-abietadiene-11,12-dione	26.429
Molecule240	Ginsenoside Re	17.739
Molecule241	Ginsenoside Rf	7.40716
Molecule242	Ginsenoside Rg1	9.70809
Molecule243	Ginsenoside Rg2	10.0923
Molecule244	Ginsenoside Rg3	5.92097
Molecule245	Ginsenoside Rh1	4.68884
Molecule246	Ginsenoside Rh2	6.5432
Molecule247	Ginsenoside Ro	2.13282
Molecule248	N-(3,5-dichlorophenyl)-1,2-dimethyl-1,2-cyclopropanedicarboximide	54.1315
Molecule249	Notoginsenoside R1	4.22141
Molecule25	9-methyllithospermateB	3.01367
Molecule250	Notoginsenoside R2	10.3155
Molecule252	Notoginsenoside R4	7.29234
Molecule253	Pentadecane	17.7321
Molecule254	acetophenone	53.7809
Molecule255	butyl cyclobutane	52.5872
Molecule256	stigmasterol	48.8299
Molecule257	cadinene	23.2916
Molecule258	caproic acid	73.0752
Molecule259	ditertbutyl phthalate	67.0226
Molecule26	9-octadecen-1-ol	27.2734
Molecule260	ethyl palmitate	6.63954
Molecule261	furan butanone	10.5935
Molecule262	germacrene	21.2633
Molecule263	glucuronic acid	3.78121
Molecule264	glycyrrhizin	35.002
Molecule265	gypenoside IX	4.83225
Molecule266	gypenoside XVII	3.51416
Molecule267	heneicosane	8.41291
Molecule268	heptadecane	8.64247
Molecule269	heptadecanoic acid	18.5106
Molecule27	Alanine	86.908
Molecule270	heptanal	19.5997
Molecule271	hexanal	19.5857
Molecule272	hexenal	54.2221
Molecule273	isoPulegone	62.0558
Molecule274	isopropyl benzene	51.9256
Molecule275	lauric acid	22.7588
Molecule276	(10Z,13Z)-nonadeca-10,13-dienoic acid	45.9826
Molecule277	linoleny alcohol	47.7917
Molecule278	lutein	19.0555
Molecule279	methyl palmitate	9.83762
Molecule28	Arginine	62.8722
Molecule280	myristic acid	21.1812
Molecule281	octadecane	8.5811
Molecule282	octanoic acid	16.4165
Molecule283	oleic acid	33.1284
Molecule284	palmitic acid	19.2966
Molecule285	palmitoleic acid	40.7759
Molecule286	palustrol	82.0843
Molecule287	panaxatriol	16.9247
Molecule288	panaxydol	27.6395
Molecule289	panaxynol	17.4273
Molecule29	Aspartate	102.007
Molecule290	panaxytriol	33.7583
Molecule291	panoxadiol	15.7275
Molecule292	parachlorophenol	66.5574
Molecule293	protopanaxatriol	20.1
Molecule294	protopanoxadiol	29.6115
Molecule295	quercetin	50.9865
Molecule296	sanchinan-A	7.57134
Molecule298	stearic acid	17.8254
Molecule299	valeraldehyde	63.7395
Molecule3	1,2-dihydro-4,4-dimcthyI-11,12-dihydroxy-13-isopropyl anthracone	28.2046
Molecule30	Caffeic acid	45.9855
Molecule300	α-Cedrene	60.561
Molecule301	α-Cyperene	55.0749
Molecule302	β-cedrene	52.2933
Molecule303	α-copaene	42.8138
Molecule304	α-guaiene	25.9358
Molecule305	α-gurjunene	57.2649
Molecule308	β-guaiene	22.8523
Molecule309	β-phenethylalcohol	24.9919
Molecule311	β-sitosterol	36.9139
Molecule312	γ-caprolactone	75.6885
Molecule313	δ-guaiene	28.4387
Molecule314	3-carene	50.1492
Molecule315	Asiatic acid	17.1376
Molecule316	Bronyl acetate	64.2953
Molecule317	Erythrodiol	12.3581
Molecule318	Junipen	15.7091
Molecule319	camphene	39.9792
Molecule32	Chlorogenic acid	27.2854
Molecule320	camphor	72.1738
Molecule321	caryophyllene oxide	40.893
Molecule322	d-Borneol	81.8031
Molecule323	dipterocarpol	46.7081
Molecule324	eucelyptol	39.7292
Molecule325	humulene	26.8145
Molecule326	isoborneol	86.9841
Molecule327	l-borneol	88.0278
Molecule328	limonene	39.9098
Molecule329	linalool	50.4485
Molecule33	Cyanidin	1.36464
Molecule330	myrcene	25.053
Molecule331	neryl acetate	62.666
Molecule332	ocimenum	14.9906
Molecule334	p-Cymene	27.2038
Molecule335	α-carypohyllene	28.119
Molecule336	α-isosafrene	43.8401
Molecule337	α-phellandrene	28.0951
Molecule338	1,4,6-trimethylcyclohexene	52.4253
Molecule339	α-terpinol	53.4641
Molecule34	Cystine	29.0182
Molecule341	β-Elemene	26.5265
Molecule342	β-caryophyllene	30.5562
Molecule343	β-pinene	49.8353
Molecule344	β-terpineol	52.9744
Molecule35	Farnesene	20.5916
Molecule36	Formyltanshinone	74.0901
Molecule37	GermacreneD	30.2065
Molecule38	Glutamate	105.507
Molecule39	Glycine	54.1519
Molecule4	1,2-dihydrotan-shinqiunone	42.5716
Molecule40	Histidine	126.133
Molecule41	Hydroxymethylenetanshinquinone	37.3564
Molecule42	Isoimperatorin	45.693
Molecule43	Isoleucine	56.0399
Molecule44	Leucine	62.7099
Molecule45	Linalyl acetate	25.16
Molecule47	Lysine	44.0571
Molecule48	Methionine	26.5638
Molecule49	Methylenetanshinone	42.3551
Molecule5	1,5-dihydroxy-3-methylanthraquinone	18.9754
Molecule50	Neo-przewaquinoneA	6.38625
Molecule53	Phenylalanine	51.3981
Molecule54	Proline	82.819
Molecule55	Przewalskin A	14.5489
Molecule56	Przewalskin B	22.1809
Molecule57	Przewalskin C	28.9421
Molecule58	Przewalskin D	17.9804
Molecule59	PrzewaquinoneA	21.8353
Molecule6	1-dehy-dromiltirone	23.8655
Molecule60	Przewaquinone B	19.6838
Molecule61	Przewaquinone C	60.9874
Molecule62	Przewaquinone D	46.3266
Molecule63	Przewaquinone F	26.8751
Molecule65	Tannin	7.29792
Molecule66	Tanshinal dehyde	57.7242
Molecule67	Tanshinol A	59.66
Molecule68	TanshinolII	63.1661
Molecule69	TanshinolⅠ	86.1569
Molecule7	1-heneicosyl formate	15.7928
Molecule70	Ursolic acid	17.457
Molecule71	Valine	70.61
Molecule72	Z-8-hexadecen-1-ol acetate	39.9977
Molecule73	aethiopinone2.mol2	24.0702
Molecule74	apigenin	19.9802
Molecule75	arucadiol	35.39
Molecule76	baicalin	10.2115
Molecule78	carnosol	15.1283
Molecule79	corosolic acid	16.1782
Molecule8	1-ketoisocryptotanshinone	17.9709
Molecule80	cryptotanshinone	57.4445
Molecule81	cyclotetradecane2.mol2	16.5886
Molecule82	cynaroside	8.89054
Molecule83	dan-shexinkum A	24.5448
Molecule84	dan-shexinkum B	48.0884
Molecule85	dan-shexinkum C	22.7096
Molecule86	dan-shexinkum D	20.6296
Molecule87	danshenspiroketallactone	62.6421
Molecule88	danshenspiroketallactoneII	97.7125
Molecule89	daucosterol	20.6319
Molecule9	2-isopropyl-8-methylphenanthrene-3,4-dione	37.631
Molecule90	dehydrouvaol	15.9628
Molecule91	deoxyneocryptotanshinone	54.5085
Molecule92	dihydroisotanshinoneⅠ	21.922
Molecule93	dihydrotanshinlactone	44.3922
Molecule94	dihydrotanshinoneⅠ	50.0433
Molecule95	diisopro-penyl methyl vinyl cyclohexane	53.434
Molecule96	dimetbyl lithosper-mateB	3.01367
Molecule97	dimethyllithospermate	2.66122
Molecule98	epicedrol2.mol2	88.0218
Molecule99	epidanshenspiroketallactone	73.5615
MoleculeCK	Ginsenoside CK	6.50823
