# Supplementary material for: A System-Level Investigation into the Mechanisms of Chinese Traditional Medicine: Compound Danshen Formula for Cardiovascular Disease Treatment
Source: PLoS One. 2012 Sep 4;7(9):e43918. doi: 10.1371/journal.pone.0043918 (PMC3433480; doi:10.1371/journal.pone.0043918)
Supplement: Table S3 — The betweenness and degree value of the Potential Targets. (XLS) [file pone.0043918.s003.xls]

## Sheet: Sheet1
Potential Targets (Short name)	Betweenness	Degree	Potential Targets (Full name)
ACE	65.5865	8	Angiotensin-converting enzyme
ACE2	0	1	Angiotensin-converting enzyme 2
Aldose reductase	372.177	14	Aldose reductase
Androgen receptor	384.838	26	Androgen receptor
Ang	32.9859	8	Angiogenin
CA2	778.172	35	Carbonic anhydrase 2
Caspase-3	413.942	24	Caspase-3
Cathepsin K	179.226	12	Cathepsin K
Cathepsin S	14.7053	5	Cathepsin S
Chymase	9.94576	5	Chymase
CYP2C9	308.076	19	Cytochrome P450 2C9
eNOS	3.36481	2	Nitric oxide synthase, endothelial
ER-alpha	248.524	18	Estrogen receptor
ER-beta	150.834	17	Estrogen receptor beta
E-selectin	17.902	4	E-selectin
F10	93.7067	11	Coagulation factor X
F2	312.19	25	Prothrombin
F7	43.5323	8	Coagulation factor VII
GR	417.37	27	Glucocorticoid receptor
HMG-CoA reductase	786.266	35	3-hydroxy-3-methylglutaryl-coenzyme A reductase
HSP90-alpha	2076.25	51	Heat shock protein HSP 90-alpha
HSP90-beta	0.376395	2	Heat shock protein HSP 90-beta
iNOS	73.6772	10	Nitric oxide synthase, inducible
LXR-alpha	44.2049	11	Oxysterols receptor LXR-alpha
LXR-beta	608.019	26	Oxysterols receptor LXR-beta
MIF	0.722656	2	Macrophage migration inhibitory factor
MMP-9	5.27307	4	Matrix metalloproteinase-9
Mn-SOD	5.43168	3	Superoxide dismutase [Mn], mitochondrial
MR	142.749	15	Mineralocorticoid receptor
PDE4D	1195.66	44	cAMP-specific 3,5-cyclic phosphodiesterase 4D
PPAR-alpha	4.85133	4	Peroxisome proliferator-activated receptor alpha
PPAR-delta	76.4305	14	Peroxisome proliferator-activated receptor delta
PPAR-gamma	260.1	18	Peroxisome proliferator-activated receptor gamma
RBP-4	482.107	27	Retinol-binding protein 4
Renin	447.652	31	Renin
RXR-alpha	541.152	31	Retinoic acid receptor RXR-alpha
RXR-beta	1449.04	40	Retinoic acid receptor RXR-beta
sPLA2-IIA	704.368	31	Phospholipase A2, membrane associated
TGF-β1R	52.5759	13	TGF-beta receptor type-1
VDR	1558.51	41	Vitamin D3 receptor
VEGFR-2	79.5125	13	Vascular endothelial growth factor receptor 2
